# Supplementary material for: Facile one-step synthesis of mesoporous Pt-based alloy nanospheres for ethanol electrooxidation
Source: Royal Society of Chemistry journal article supplement (doi:10.1039/d3cc04416e), 2023-11-15
Supplement: d3cc04416e1.pdf [file d3cc04416e1.pdf]

## **Electronic Supplementary Information**

### **Facile one-step synthesis of mesoporous Pt-based alloy nanospheres for ethanol electrooxidation†**

#### **Experimental section**

##### **1.1 Materials**

Potassium hexachloroplatinate (IV) ( $\text{K}_2\text{PtCl}_6$ , 98%), hexadecyl trimethyl ammonium bromide (CTAB, 99%), ascorbic acid (AA, 99.99% metals basis), iron (III) chloride ( $\text{FeCl}_3$ , 98%), copper chloride ( $\text{CuCl}_2$ , 98%), cobalt (II) acetate tetrahydrate ( $\text{C}_4\text{H}_6\text{Co}\cdot 4\text{H}_2\text{O}$ , ACS) and nickel chloride hexahydrate ( $\text{NiCl}_2\cdot 6\text{H}_2\text{O}$ , 98%) were all purchased from Shanghai Aladdin Biochemical Technology Co. Ltd., China. Pluronic F127 was obtained from Sigma-Aldrich Co. Ltd., China. Ethanol, hydrochloric acid ( $\text{HCl}$ , 36~38 wt%) and sulfuric acid ( $\text{H}_2\text{SO}_4$ , 95~98 wt%) were obtained from Yunnan Jingrui Technology Co. Ltd., China. The commercial Pt/C (40%) and Nafion PFSA polymer dispersion D520 (5%) were obtained from Suzhou Sinero Technology Co. Ltd., China. Deionized water (Milli-Q,  $18.2\text{ M}\Omega\cdot\text{cm}$ ) was used in all experiments. All chemicals and solvents were used as received without further purification.

##### **1.2 Synthesis of mesoporous Pt nanospheres**

In a typical synthesis, 2.1 g of CTAB and 0.4 g of F127 were completely dissolved in 80 ml  $\text{H}_2\text{O}$  by using ultrasound. Then, 20 ml of  $\text{K}_2\text{PtCl}_6$  solution (0.02 M) was added to above solution and stayed at 85 °C for 15 min. After addition of 20 ml freshly prepared AA aqueous solution (1 M), the obtained mixed was aged at 85 °C for 4 h.

Finally, the product was separated by centrifugation at 8000 rpm for 5 min, washed by ethanol and deionized water. To extract the surfactant, the product was ultrasonically dispersed in ethanol solution containing HCl (36~38 wt%) and vigorously stirred at 80 °C for 4 h. The above steps were repeated for three times.

### **1.3 Synthesis of mesoporous Pt based alloy nanospheres**

The procedure of mesoporous Pt based alloy nanospheres was similar with mesoporous Pt nanospheres, except adding 10 ml of other metal precursor solution (0.02 M) and 10 ml of  $K_2PtCl_6$  solution. The other steps were the same.

### **1.4 Electrochemical measurement**

The electrochemical measurement was performed in a conventional three-electrode cell, including an Ag/AgCl (containing 3.0 M KCl solution) electrode as a reference electrode, a platinum wire as a counter electrode, and a modified glassy carbon electrode (GCE, 3 mm in diameter) as a working electrode. The working electrode was prepared by polishing the GCE, 5.0  $\mu$ l of Nafion alcohol solution (0.05 wt% of Nafion) was coated on the surface of the modified GCE with 5.0  $\mu$ g of sample material and dried before electrochemical experiments. Prior to electrochemical experiments, the GCE modified with the samples were activated electrochemically by cycling the electrode potential between -0.2 V and +1.0 V (vs. Ag/AgCl) in 0.5 M  $H_2SO_4$  until cyclic voltammetry (CV) curves that were characteristic for a clean Pt electrode were obtained. Ethanol electrooxidation measurements were performed in a solution of 0.5 M  $H_2SO_4$  containing 0.5 M ethanol at a scan rate of 50 mV/s. The CV measurements were performed at scan rates of 10, 20, 50, 100 and 200 mV/s and the EIS measurements of the amplitude was 10 mV in the frequency range from 0.1 Hz to 1000 kHz. The chronoamperometric measurement was carried out at a constant potential of 0.6 V for 3600 s

### **1.5 Characterization**

Scanning electron microscopy (SEM) was carried out using a Hitachi Regulus 8100 microscope operated at 5.0 kV (Hitachi High-Tech Corporation, Japan). Transmission electron microscopy (TEM), energy dispersive X-ray (EDX) maps and high-angle annular dark-field scanning TEM (HAADF-STEM) observations were performed using

a JEM-F200 operated at 200 kV equipped and JEM-1400Flash operated at 120 kV accelerating voltage (JEOL Ltd., Japan). A statistical analysis of the average size of the mesoporous Pt and Pt-based alloy particles was estimated by counting the diameter of 50 random particles from the TEM images. N<sub>2</sub> adsorption-desorption isotherms were acquired on Belsorp Max (Microtracbel Japan, Inc.) at 77 K. Brunauer-Emmett-Teller (BET) surface areas and pore size distribution was estimated from the N<sub>2</sub> adsorption-desorption isotherms via the BJH method. X-ray diffractometer (XRD, D2 PHASER, Bruker, Germany) was employed to record the diffraction signal of varies composition of samples with Cu K radiation ( $\lambda=1.542 \text{ \AA}$ ). X-ray photoelectron spectroscopy (XPS) measurements were on Thermo Scientific K-Alpha (Thermo Fisher Ltd., USA). The composition of the mesoporous PtCu was determined using an inductively coupled plasma optical emission spectrometer (ICP-OES) via Agilent 5110 ICP-OES (Agilent Ltd., USA). Electrochemical measurements were conducted a RST5210F electrochemical workstation (Zhengzhou Shiruisi Technology Co. Ltd., China).

### 1.6 Electrochemical surface area (ECSA) calculations

ECSA was calculated according to the reported method<sup>1-3</sup>, CV was recorded in 0.5 M H<sub>2</sub>SO<sub>4</sub> at a scan rate of 50 mV s<sup>-1</sup> to measure the ECSA of m-Pt, m-PtM and Pt/C. Here, the calculation method is simply introduced with Pt/C as an example. The ECSA of Pt/C in the working electrode is calculated using Equation 1 from the hydrogen desorption charge (Q<sub>H</sub>) in the positive-going potential scan (−0.13 ~ 0.15 V) in CV profile in Figure S8 after correction for double-layer charging (by subtracting the current at 0.15 V from total current). The minimum potential is selected just above the potential of the H<sub>2</sub> desorption peak, as shown in Figure S8a. The charge of full coverage for clean polycrystalline Pt is Q<sub>H</sub> = 210 μC cm<sup>-2</sup>, which is used as the conversion factor. m (mg) is the Pt mass in the electrode.

$$\text{ECSA} = 10^5 \times Q_{\text{H-desorption}} / 210m \text{ (m}^2\text{/g)} \quad (1)$$

### 1.7 DFT calculations

DFT calculations were performed with the first principle calculations. Electronic structures were calculated using the generalized gradient approximation with the

Perdew-Burke-Ernzerh (GGA-PBE) functional. The projector-augmented-wave (PAW) pseudopotentials were used to describe electron-ion interactions. The kinetic energy cutoff for the plane-wave expansion was 450 eV. The geometry optimization was considered convergent when the force change was smaller than 0.05 eV/Å. The Brillouin zone was sampled with a gamma-centered grid  $3 \times 3 \times 1$  through all the computational process. Periodic boundary conditions were used in all directions and a vacuum layer of 15 Å was used in the z-direction to eliminate the slab interaction in the z direction. The adsorption energy ( $E_{\text{ads}}$ ) of adsorbate molecule was defined as:

$$E_{\text{ads}} = E_{\text{mol/surf}} - E_{\text{surf}} - E_{\text{mol}}$$

where  $E_{\text{mol/surf}}$ ,  $E_{\text{surf}}$  and  $E_{\text{mol}}$  are the total electronic energy of adsorbate molecule adsorbed on the surface, the energy of clean surface, and the energy of free adsorbates respectively.

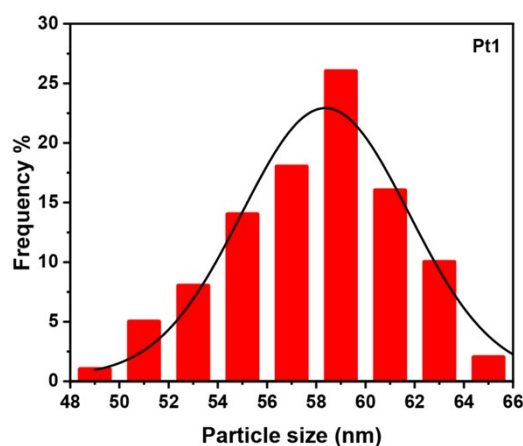

**Figure S1** The particle size distribution of m-Pt1.

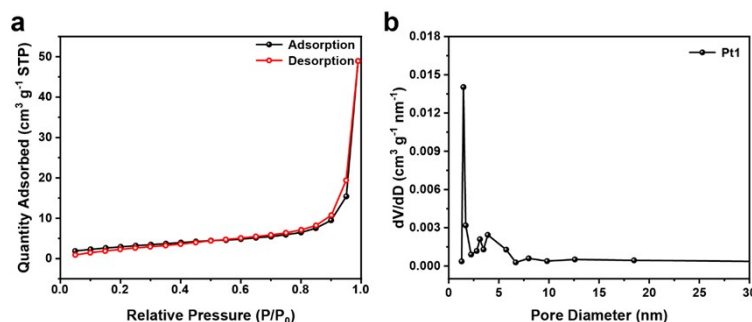

**Figure S2** (a) N<sub>2</sub> adsorption/desorption isotherms of m-Pt1 and (b) the pore-size distribution curve obtained from BJH method.

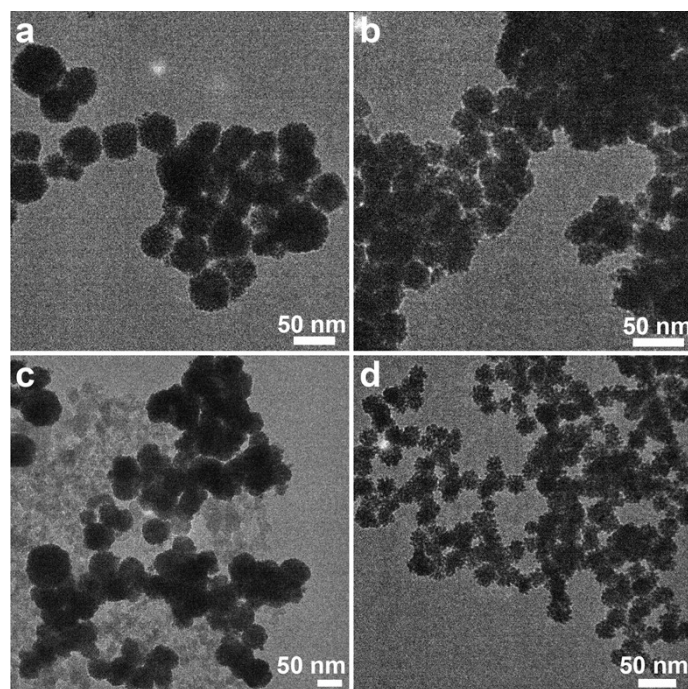

**Figure S3** TEM images of mesoporous Pt nanospheres with different mass ratios of CTAB/F127: (a) 1/0, (b) 1/1, (C) 1/5 and (d) 0/1.

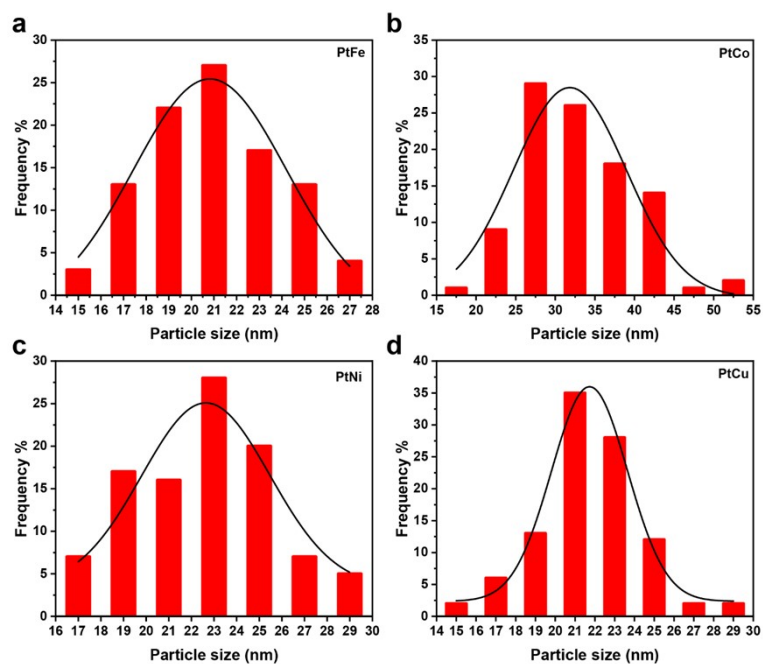

**Figure S4** The particle size distribution of m-PtM alloys.

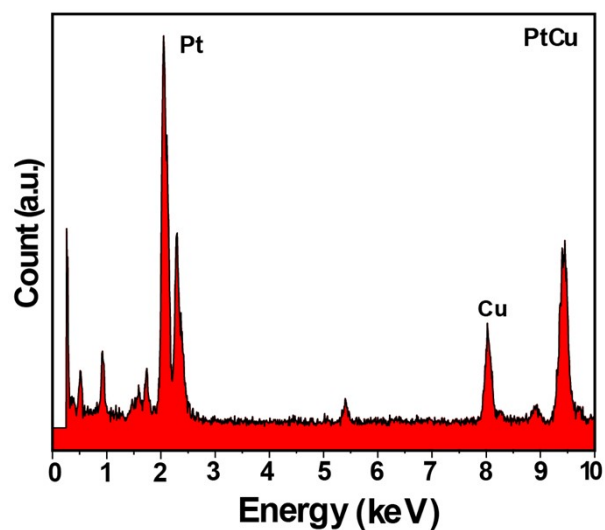

**Figure S5** EDX elemental spectrum corresponding to PtCu alloy.

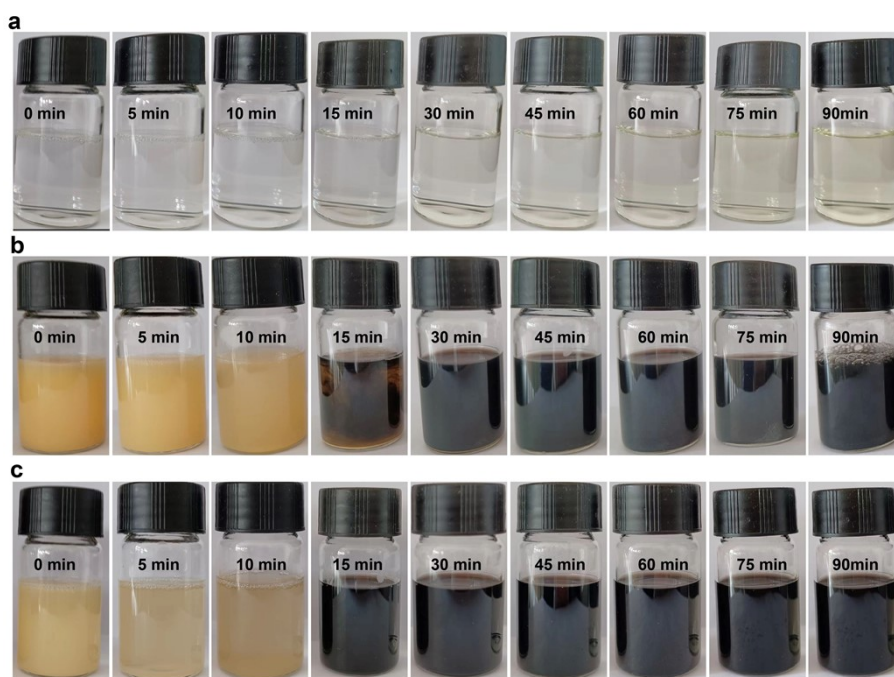

**Figure S6** Photographs of colloidal suspensions taken at 85 °C with different reaction times: (a) 0.02 M  $\text{CuCl}_2$ ; (b) 0.02 M  $\text{K}_2\text{PtCl}_6$  and (c) the volume ratio of  $\text{K}_2\text{PtCl}_6/\text{CuCl}_2=1/1$ .

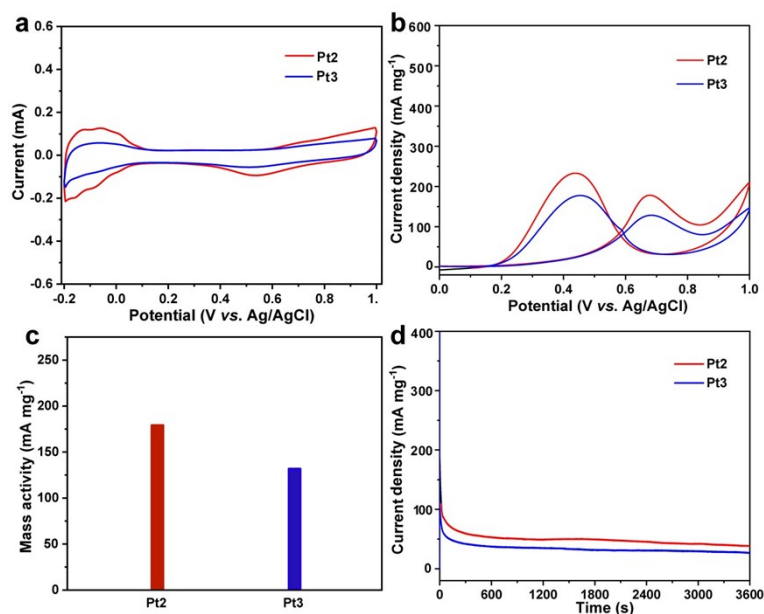

**Figure S7** Electrocatalytic properties of m-Pt2 and m-Pt3: CV curves recorded in (a) 0.5 M H<sub>2</sub>SO<sub>4</sub> and (b) 0.5 M H<sub>2</sub>SO<sub>4</sub>+0.5 M ethanol at a scan rate of 50 mV s<sup>-1</sup>, (c) mass activity and (d) CA curves (recorded at 0.6 V vs. RHE for 3600 s) for EOR in 0.5 M H<sub>2</sub>SO<sub>4</sub> + 0.5 M ethanol.

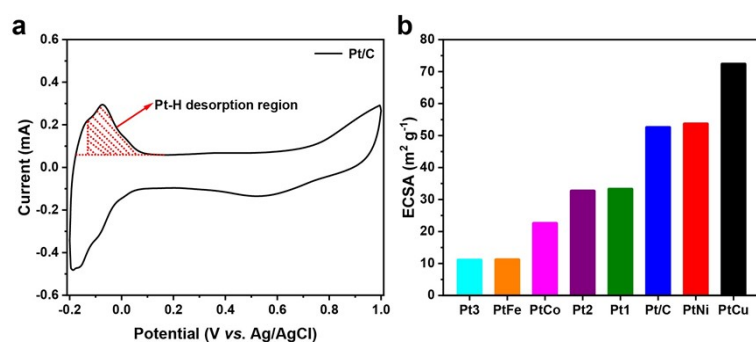

**Figure S8** (a) CV curves of the Pt/C recorded in 0.5 M H<sub>2</sub>SO<sub>4</sub> at a scan rate of 50 mV s<sup>-1</sup>, the shaded region showed the area integrated for hydrogen desorption; (b) the ECSA corresponding to each sample.

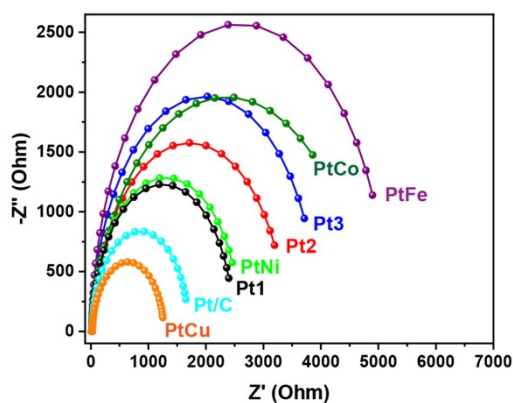

**Figure S9** EIS curves of m-Pt and m-PtM alloys compared with commercial Pt/C.

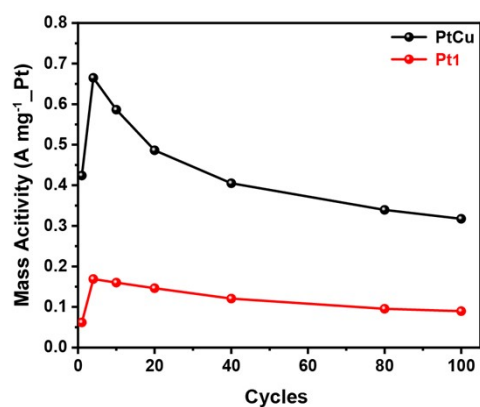

**Figure S10** Cycling stability curves of m-Pt1 and m-PtCu for EOR.

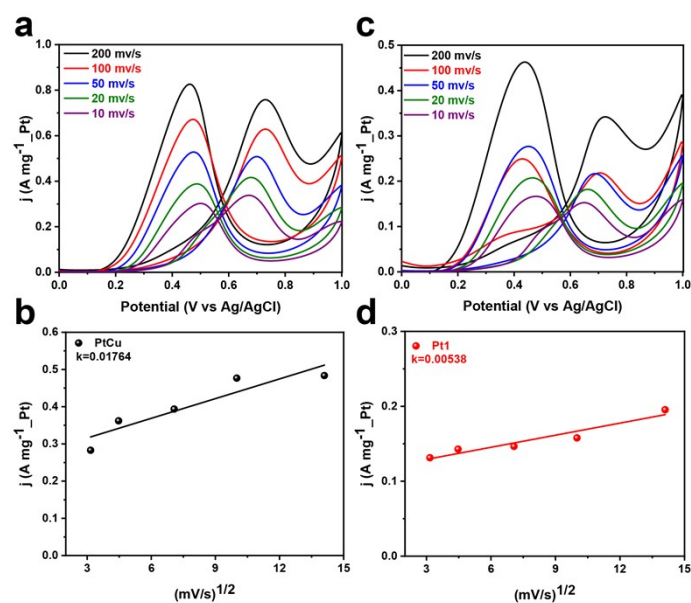

**Figure S11** CV curves of (a) m-PtCu and (c) m-Pt1 with different scan rates, the relationship of forward oxidation peak current density vs. scan rate for (b) m-PtCu and (d) m-Pt1.

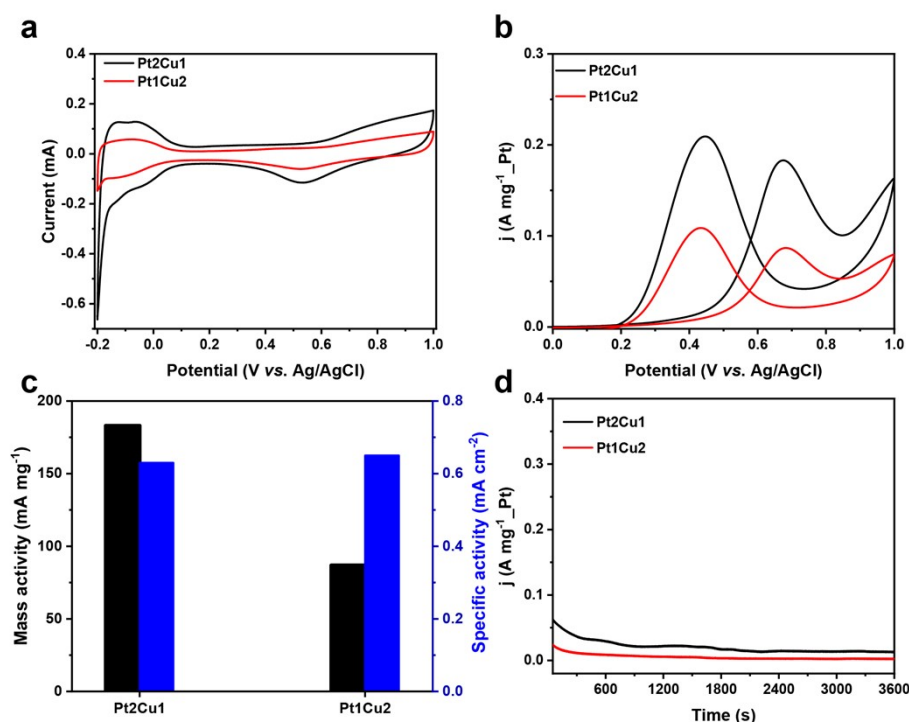

**Figure S12** Electrocatalytic properties of m-Pt<sub>2</sub>Cu<sub>1</sub> and m-Pt<sub>1</sub>Cu<sub>2</sub>: CV curves recorded in (a) 0.5 M H<sub>2</sub>SO<sub>4</sub> and (b) 0.5 M H<sub>2</sub>SO<sub>4</sub>+0.5 M ethanol at a scan rate of 50 mV s<sup>-1</sup>, (c) mass and specific activities, (d) CA curves (recorded at 0.6 V vs. RHE for 3600 s) for EOR in 0.5 M H<sub>2</sub>SO<sub>4</sub> + 0.5 M ethanol.

The ESCA values of m-Pt<sub>2</sub>Cu<sub>1</sub> and m-Pt<sub>1</sub>Cu<sub>2</sub> were determined to be 29.2 m<sup>2</sup> g<sup>-1</sup> and 13.4 m<sup>2</sup> g<sup>-1</sup>, respectively. The CV measurements and mass activities of m-Pt<sub>2</sub>Cu<sub>1</sub> and m-Pt<sub>1</sub>Cu<sub>2</sub> for the EOR are shown in Fig. S12b and c. The mass activities of m-Pt<sub>2</sub>Cu<sub>1</sub> and m-Pt<sub>1</sub>Cu<sub>2</sub> were measured to be 183.1 and 86.6 mA mg<sup>-1</sup>, respectively.

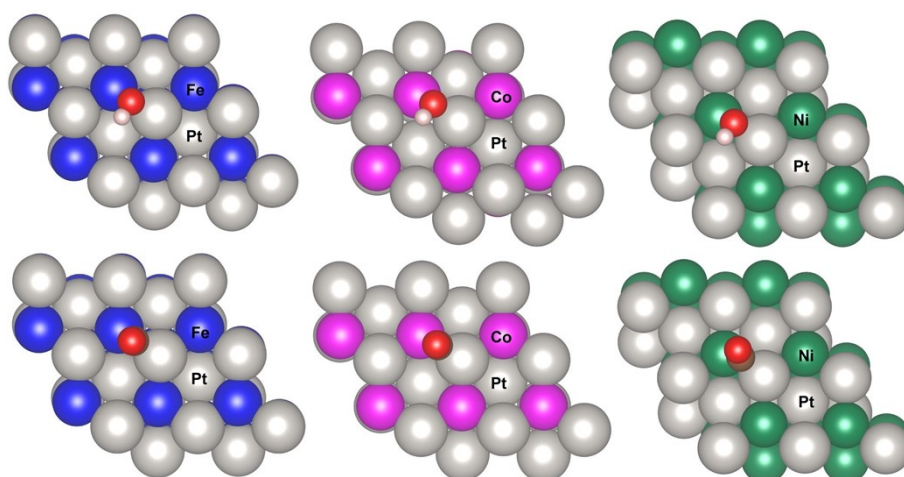

**Figure S13** Adsorption configurations of OH and CO on the (111) surface of PtFe, PtCo, and PtNi alloys.

Ruyi Wang: conceptualization, conducting experiments, visualization, draft preparation. Shichun Gu: methodology. Dexiang Li: conceptualization. Chaoman Wang: collecting and analyzing data. Chongyuan Zhai: visualization. Yu Sun: DFT calculation and analysis. Xue Wang: conceptualization, supervision, review and editing. Hui Huang: funding acquisition and resources. Zhongcheng Guo: provision of research materials, instruments and analysis tools. Yapeng He: conceptualization, supervision, review and revision of the draft.

## References

1. C. Han, Y. Lyu, S. Wang, B. Liu, Y. Zhang, J. Lu and H. Du, *Carbon Energy*, 2023, **5**, e339.
2. X. Fu, C. Wan, A. Zhang, Z. Zhao, H. Huyan, X. Pan, S. Du, X. Duan and Y. Huang, *Nano Res.*, 2020, **13**, 1472-1478.
3. T. H. T. Vu, T. T. Nguyen, T. H. Nguyen, M. D. Nguyen and Q. M. Nguyen, *Electrochim. Acta*, 2021, **380**, 138258.
